# Supplementary material for: A Risk Assessment of the Jaffe vs Enzymatic Method for Creatinine Measurement in an Outpatient Population
Source: PLoS One. 2015 Nov 24;10(11):e0143205. doi: 10.1371/journal.pone.0143205 (PMC4657986; doi:10.1371/journal.pone.0143205)
Supplement: S2 Data — (XLSX) [file pone.0143205.s007.xlsx]

## Sheet: Jaffe vs Enz Comparison Data
obs	E_CRT	J_CRT
106	0.76	0.78
138	0.79	0.83
169	0.83	0.83
179	0.84	0.81
46	0.68	0.71
133	0.78	0.82
119	0.77	0.7
177	0.84	0.8
3	0.49	0.89
123	0.77	0.77
64	0.7	0.75
142	0.79	0.79
299	0.98	0.94
16	0.61	0.69
159	0.81	0.81
212	0.88	0.88
325	1	0.96
11	0.59	0.64
17	0.61	0.69
85	0.73	0.74
199	0.86	0.84
151	0.8	0.81
182	0.84	0.85
333	1.02	1.07
344	1.04	1.03
370	1.08	1.04
15	0.6	0.71
99	0.75	0.75
203	0.87	0.82
218	0.88	0.85
246	0.92	1.07
275	0.95	0.86
451	1.29	1.25
68	0.71	0.72
82	0.72	0.76
163	0.82	0.82
238	0.92	0.9
276	0.95	0.91
310	0.98	0.87
140	0.79	0.82
196	0.85	0.87
261	0.94	0.91
367	1.07	1.01
369	1.07	1.01
490	1.48	1.49
14	0.59	0.67
70	0.71	0.75
120	0.77	0.8
258	0.94	0.91
295	0.97	1.08
389	1.12	1.08
67	0.71	0.72
174	0.83	0.82
235	0.91	0.9
331	1.02	1.01
21	0.62	0.68
52	0.69	0.74
90	0.73	0.78
394	1.13	1.1
39	0.67	0.68
45	0.68	0.69
109	0.76	0.75
127	0.77	0.8
314	0.99	0.95
453	1.29	1.29
28	0.64	0.72
49	0.68	0.72
74	0.71	0.71
191	0.85	0.86
193	0.85	0.82
211	0.88	0.85
352	1.05	0.99
365	1.07	1.05
9	0.58	0.66
58	0.69	0.76
94	0.74	0.75
229	0.9	0.87
257	0.94	0.86
277	0.95	0.89
322	1	0.96
2	0.46	0.57
29	0.65	0.77
122	0.77	0.76
154	0.81	0.8
263	0.94	0.89
279	0.96	1.04
284	0.96	0.86
392	1.12	1.08
402	1.15	1.14
469	1.35	1.24
501	1.62	1.6
44	0.68	0.75
56	0.69	0.76
83	0.73	0.76
116	0.76	0.77
171	0.83	0.8
233	0.91	0.84
269	0.94	0.89
285	0.96	0.89
296	0.97	0.98
328	1.01	0.99
428	1.22	1.11
480	1.41	1.44
124	0.77	0.78
160	0.82	0.79
234	0.91	0.96
270	0.95	0.9
308	0.98	0.93
376	1.09	1.06
431	1.24	1.01
439	1.27	1.19
503	1.65	1.62
517	1.82	1.69
108	0.76	0.74
118	0.77	0.74
129	0.78	0.79
226	0.9	0.94
347	1.04	1.02
19	0.61	0.66
22	0.62	0.72
27	0.64	0.73
73	0.71	0.74
110	0.76	0.77
168	0.83	0.8
198	0.86	0.83
251	0.93	0.92
259	0.94	0.89
297	0.97	1.02
404	1.15	1.09
190	0.85	0.85
311	0.99	0.96
332	1.02	0.94
339	1.03	1.05
361	1.07	1.04
378	1.1	1.1
23	0.63	0.69
50	0.68	0.73
84	0.73	0.76
166	0.83	0.81
183	0.84	0.83
268	0.94	0.93
293	0.97	0.98
385	1.11	1.09
405	1.15	1.15
477	1.4	1.37
1	0.46	0.54
62	0.7	0.7
104	0.75	0.74
112	0.76	0.76
204	0.87	0.88
298	0.98	0.92
375	1.09	1.24
380	1.1	1.01
416	1.19	1.15
460	1.32	1.21
6	0.53	0.6
309	0.98	0.99
346	1.04	1.01
368	1.07	1.05
34	0.66	0.68
76	0.72	0.79
107	0.76	0.75
136	0.79	0.8
338	1.03	0.99
415	1.18	1.14
539	4.58	4.46
8	0.58	0.69
31	0.65	0.74
100	0.75	0.76
172	0.83	0.81
216	0.88	0.89
225	0.89	0.85
388	1.12	1.01
459	1.3	1.31
30	0.65	0.7
79	0.72	0.82
161	0.82	0.82
185	0.84	0.84
206	0.87	0.85
313	0.99	0.92
364	1.07	1.06
527	2.45	2.55
54	0.69	0.76
81	0.72	0.82
147	0.8	0.8
164	0.82	1.05
358	1.06	1.01
371	1.08	1
396	1.13	1.18
427	1.22	1.18
7	0.54	0.73
42	0.68	0.7
77	0.72	0.74
207	0.87	0.83
243	0.92	0.87
244	0.92	0.85
266	0.94	1.04
306	0.98	0.97
377	1.1	1.11
446	1.28	1.22
137	0.79	0.77
254	0.93	0.92
255	0.93	0.92
307	0.98	0.93
326	1.01	0.95
330	1.02	0.98
496	1.52	1.5
511	1.77	1.76
78	0.72	0.72
89	0.73	0.78
111	0.76	0.77
115	0.76	0.78
126	0.77	0.75
149	0.8	0.77
173	0.83	0.83
265	0.94	0.85
271	0.95	0.91
287	0.96	0.92
305	0.98	0.96
372	1.08	1.06
467	1.34	1.39
60	0.7	0.71
88	0.73	0.75
278	0.95	0.9
449	1.29	1.32
513	1.8	2.04
524	2.27	2.3
529	2.67	2.7
55	0.69	0.73
65	0.7	0.74
113	0.76	0.77
227	0.9	0.81
248	0.92	0.87
303	0.98	0.96
329	1.02	0.97
442	1.27	1.32
518	1.88	1.88
5	0.51	0.69
25	0.64	0.72
141	0.79	0.81
184	0.84	0.84
201	0.86	0.8
252	0.93	0.91
273	0.95	0.85
320	1	0.99
387	1.12	1.17
450	1.29	1.31
95	0.74	0.72
102	0.75	0.77
130	0.78	0.84
148	0.8	0.76
202	0.87	0.8
223	0.89	0.93
240	0.92	0.92
247	0.92	0.86
283	0.96	0.92
336	1.03	1
48	0.68	0.73
53	0.69	0.69
72	0.71	0.78
144	0.8	0.76
192	0.85	0.82
250	0.93	0.9
253	0.93	0.93
272	0.95	0.96
292	0.96	0.94
318	1	0.92
356	1.06	1.05
362	1.07	1.22
373	1.09	1.03
422	1.2	1.11
435	1.24	1.21
468	1.34	1.27
489	1.46	1.62
505	1.67	1.77
516	1.81	1.7
534	3.69	3.7
18	0.61	0.67
71	0.71	0.76
87	0.73	0.72
93	0.74	0.73
101	0.75	0.74
134	0.79	0.8
146	0.8	0.81
162	0.82	0.85
290	0.96	1.04
312	0.99	0.97
327	1.01	1
397	1.13	1.01
403	1.15	1.09
408	1.16	1.1
418	1.19	1.2
20	0.61	0.77
43	0.68	0.75
187	0.85	0.82
210	0.88	0.92
288	0.96	0.89
291	0.96	1
323	1	0.96
391	1.12	1.11
406	1.16	1.11
535	3.93	3.94
536	3.94	3.91
12	0.59	0.66
57	0.69	0.85
103	0.75	0.99
135	0.79	0.96
194	0.85	0.79
264	0.94	0.95
315	0.99	0.96
343	1.04	1.05
353	1.05	1.01
381	1.1	1.06
456	1.3	1.24
486	1.45	1.48
38	0.67	0.75
97	0.74	0.76
143	0.8	0.78
150	0.8	0.82
155	0.81	0.78
167	0.83	0.84
188	0.85	0.79
282	0.96	0.91
419	1.19	1.19
421	1.2	1.17
438	1.27	1.22
540	4.94	4.87
61	0.7	0.76
63	0.7	0.7
75	0.72	0.74
98	0.74	0.76
121	0.77	0.75
125	0.77	0.92
189	0.85	0.86
222	0.89	0.86
236	0.91	0.85
401	1.14	1.13
430	1.24	1.14
464	1.33	1.33
485	1.44	1.35
498	1.57	1.57
512	1.77	1.67
37	0.67	0.74
208	0.87	0.84
262	0.94	0.95
286	0.96	0.9
482	1.42	1.43
492	1.49	1.48
35	0.66	0.69
91	0.73	0.76
205	0.87	0.84
245	0.92	0.83
260	0.94	0.88
319	1	0.95
348	1.05	0.98
398	1.14	1.09
423	1.2	1.24
483	1.43	1.34
92	0.74	0.73
132	0.78	0.77
156	0.81	0.81
219	0.88	0.9
249	0.93	0.91
267	0.94	0.87
274	0.95	0.84
341	1.03	1.05
409	1.17	1.08
412	1.17	1.1
470	1.35	1.35
504	1.66	1.65
36	0.67	0.74
80	0.72	0.74
180	0.84	0.9
231	0.91	0.87
232	0.91	0.85
242	0.92	1.05
345	1.04	1.04
400	1.14	1.1
434	1.24	1.33
443	1.27	1.25
455	1.3	1.48
499	1.58	1.56
533	3.59	3.54
178	0.84	0.81
349	1.05	1.05
382	1.1	1.18
393	1.13	1.07
410	1.17	1.15
424	1.21	1.16
436	1.25	1.19
437	1.26	1.2
452	1.29	1.36
454	1.3	1.18
484	1.44	1.44
502	1.65	1.64
509	1.74	1.75
41	0.67	0.72
139	0.79	0.8
316	0.99	1.03
342	1.04	0.99
363	1.07	1.03
411	1.17	1.12
417	1.19	1.17
432	1.24	1.23
461	1.32	1.37
476	1.4	1.38
481	1.42	1.37
507	1.7	1.71
528	2.49	2.65
538	4.45	4.41
152	0.8	0.87
153	0.8	0.83
176	0.84	0.79
334	1.02	1.1
360	1.07	1.06
390	1.12	1.15
466	1.33	1.34
500	1.59	1.55
105	0.76	0.73
165	0.82	0.83
186	0.85	0.81
221	0.89	0.91
280	0.96	0.92
300	0.98	0.9
354	1.06	1.05
357	1.06	1
374	1.09	1.11
399	1.14	1.15
457	1.3	1.3
522	2.25	2.25
33	0.66	0.83
170	0.83	0.81
214	0.88	0.83
237	0.91	0.9
256	0.93	0.89
463	1.33	1.29
474	1.39	1.25
488	1.46	1.34
494	1.5	1.52
526	2.38	2.37
66	0.7	0.73
195	0.85	0.84
197	0.86	0.85
209	0.87	0.85
213	0.88	0.83
324	1	0.94
386	1.11	1.04
407	1.16	1.08
447	1.28	1.27
462	1.32	1.29
473	1.38	1.55
175	0.84	0.83
200	0.86	0.82
215	0.88	0.91
301	0.98	0.95
317	0.99	0.94
433	1.24	1.23
479	1.4	1.33
32	0.65	0.68
59	0.69	0.7
302	0.98	0.93
425	1.21	1.17
497	1.53	1.49
531	3.49	3.52
532	3.57	3.97
114	0.76	0.8
217	0.88	0.85
239	0.92	0.93
355	1.06	1.05
383	1.11	1.1
491	1.48	1.57
521	2.05	2.15
537	4.24	4.18
337	1.03	1.16
350	1.05	1.02
420	1.2	1.16
440	1.27	1.26
445	1.28	1.18
448	1.29	1.3
478	1.4	1.51
514	1.8	2.13
289	0.96	0.98
321	1	0.98
340	1.03	1.03
379	1.1	1.06
414	1.18	1.03
441	1.27	1.27
444	1.28	1.28
458	1.3	1.17
471	1.36	1.3
519	1.95	2.01
26	0.64	0.7
40	0.67	0.72
366	1.07	1
426	1.21	1.22
523	2.25	2.24
128	0.77	0.8
241	0.92	0.88
351	1.05	1.04
413	1.18	1.14
493	1.49	1.48
530	3.41	3.63
47	0.68	0.72
96	0.74	1.02
294	0.97	0.94
472	1.36	1.39
475	1.4	1.37
487	1.46	1.48
510	1.75	1.73
520	1.99	2
10	0.59	0.64
157	0.81	0.8
515	1.81	1.71
508	1.73	1.82
181	0.84	0.82
384	1.11	1.1
429	1.22	1.18
335	1.03	0.94
359	1.06	1.16
395	1.13	1.12
117	0.77	0.77
304	0.98	0.88
495	1.52	1.55
506	1.69	1.65
224	0.89	0.9
465	1.33	1.29
525	2.31	2.3
220	0.89	0.81
228	0.9	0.85
